# Supplementary material for: MnCO3/Mn3O4/reduced graphene oxide ternary anode materials for lithium-ion batteries: facile green synthesis and enhanced electrochemical performance
Source: Royal Society of Chemistry journal article supplement (doi:10.1039/c7ta02874a), 2017-01-01
Supplement: c7ta02874a1.pdf [file c7ta02874a1.pdf]

## Electronic Supplementary Information (ESI)

# MnCO<sub>3</sub>/Mn<sub>3</sub>O<sub>4</sub>/Reduced Graphene Oxide Ternary Anode Materials for Lithium-Ion Batteries: Facile Green Synthesis and Enhanced Electrochemical Performance

Rui Zhang,<sup>a,b</sup> Dong Wang,<sup>a</sup> Lu-Chang Qin,<sup>b</sup> Guangwu Wen,<sup>\*a,c</sup> Hong Pan,<sup>a</sup> Yingfei Zhang,<sup>a</sup> Nan Tian,<sup>a</sup> Yu Zhou<sup>a</sup> and Xiaoxiao Huang<sup>\*a</sup>

<sup>a</sup>School of Materials Science and Engineering, Harbin Institute of Technology, Harbin 150001, China.

<sup>b</sup> Department of Physics and Astronomy, University of North Carolina at Chapel Hill, Chapel Hill, NC 27599-3255, USA..

<sup>c</sup> School of Materials Science and Engineering, Shandong University of Technology, Zibo, 255000, China.

\*Address correspondence to g.wen@hit.edu.cn; swliza@hit.edu.cn

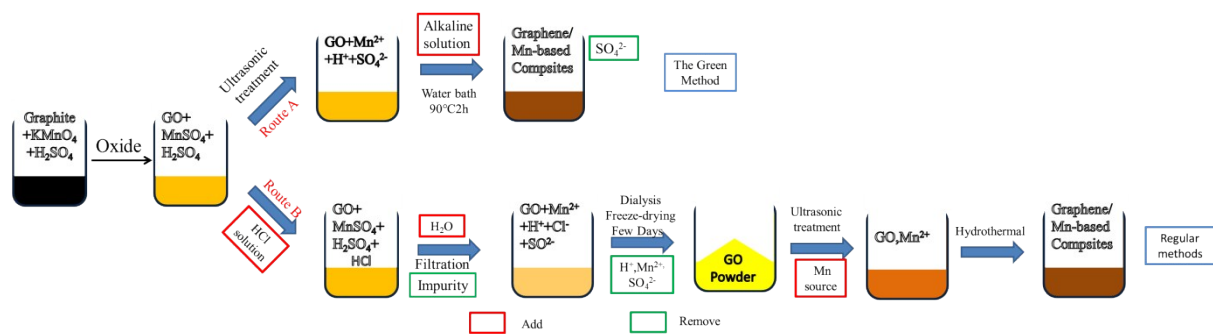

**Fig. S1** Schematic illustration of the experimental processes of the Mn-based compound /graphene composites in this work and the regular method in other works.

Generally, the fabrication of the RGO composites in the regular methods is started from the oxidation of graphite using Hummers method, followed by adding HCl solution to dissolve impurities and a large amount of water to dilute the solution, along with spending a few days to dialysis the solution to neutral and freeze-dry to get GO powder. Subsequently, the as-obtained GO powder and metal precursor were well dispersed in water or organic solution, then the solution was transferred to a Teflon-lined autoclave and maintained at 120~220 °C for hours. After washed and dried again, the composites can be obtained, through a time-consuming, raw material wasting process with large amount of acidic effluent discharged.

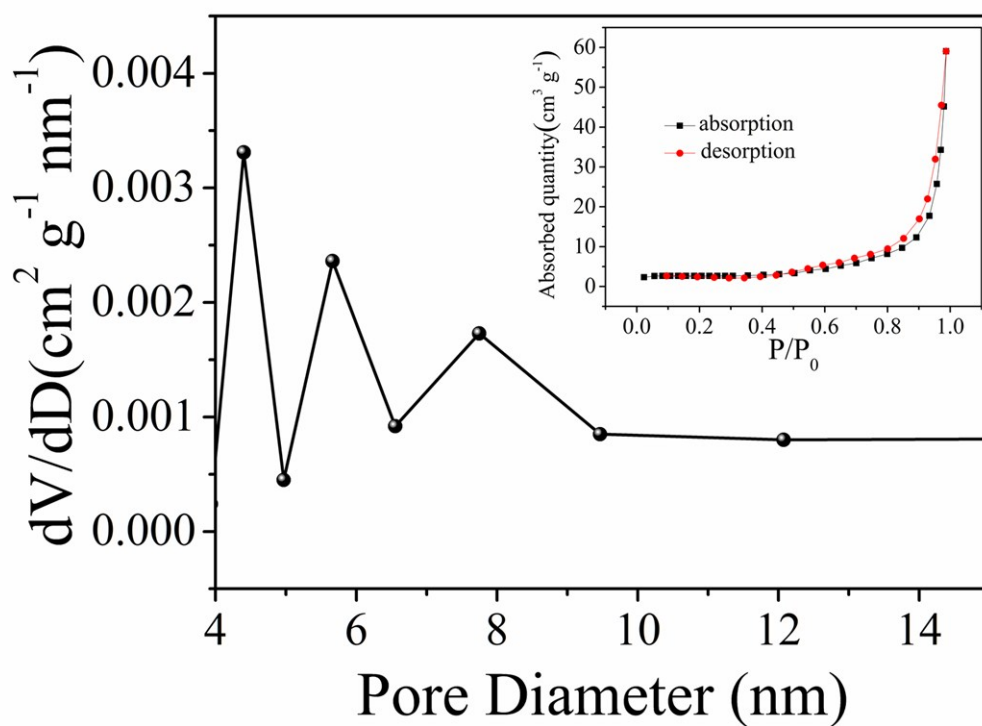

**Fig. S2**  $\text{N}_2$  adsorption and desorption isotherms and the pore size distribution of the  $\text{MnCO}_3/\text{Mn}_3\text{O}_4/\text{RGO}$  composites

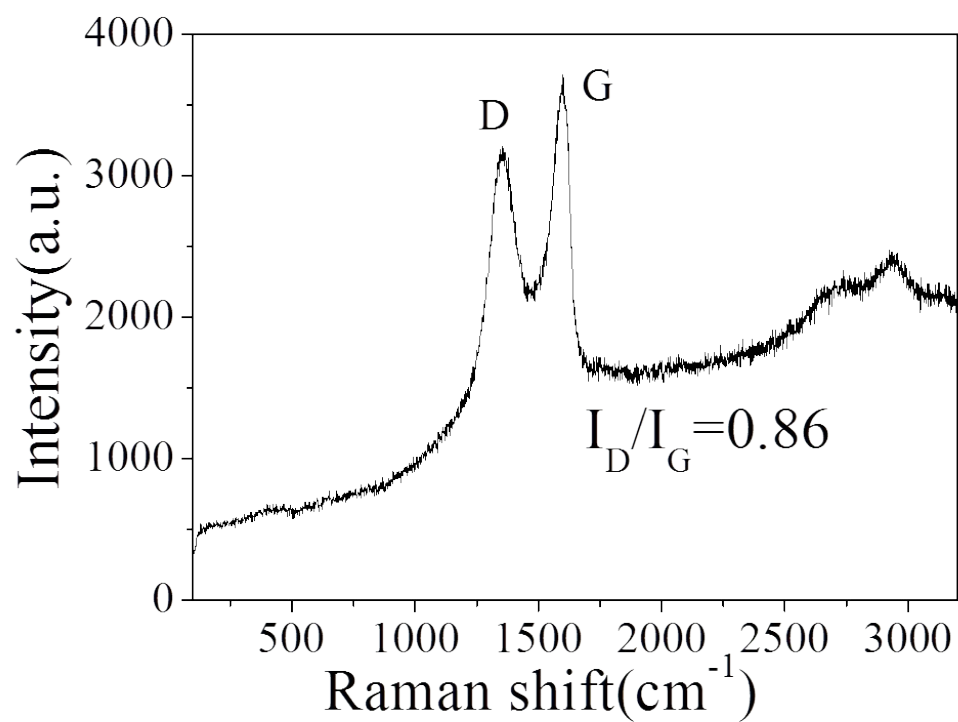

**Fig. S3.** Raman spectra of GO with the  $I_D/I_G$  of 0.86.

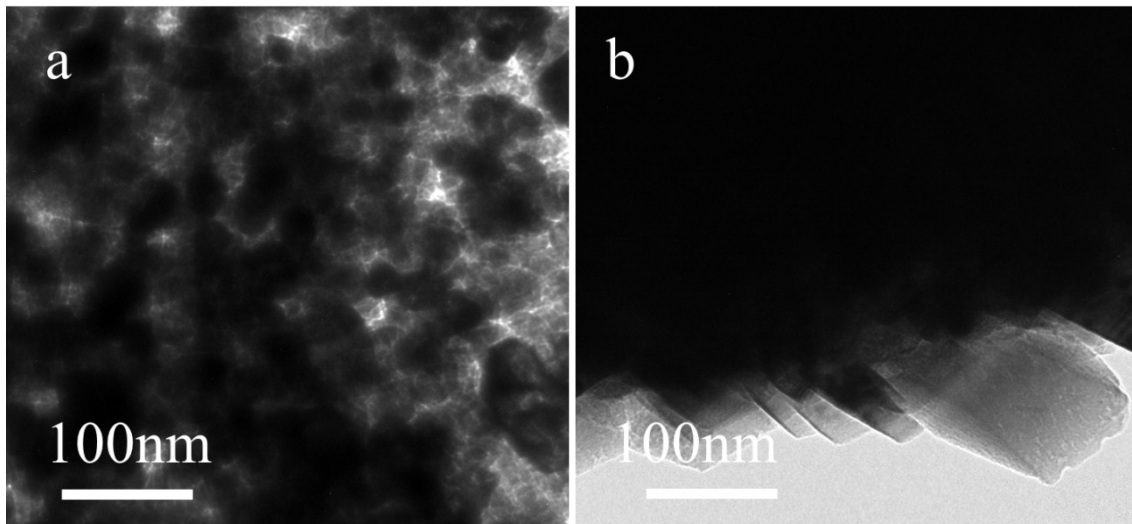

**Fig. S4** TEM image of (a) MnCO<sub>3</sub>/Mn<sub>3</sub>O<sub>4</sub>/RGO ternary composite and (b) MnCO<sub>3</sub>/RGO composite.

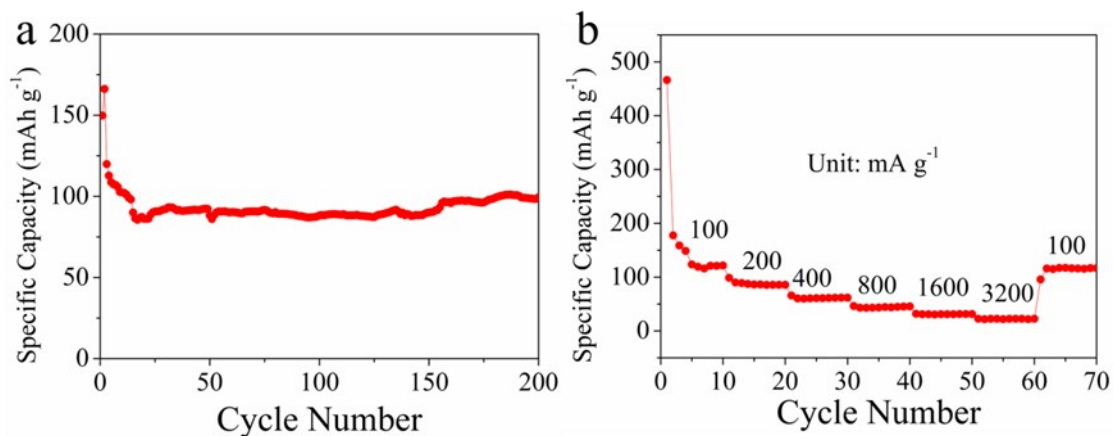

**Fig. S5** (a) Cycling performance at 200 mA g<sup>-1</sup>; (b) Rate capabilities of RGO

The reversible capacity of RGO after 200 cycles is 102 mAh g<sup>-1</sup> at 200 mA g<sup>-1</sup>. In addition, the RGO exhibits reversible capacities of 150, 107, 60.1, 43.7, 31.1, and 22.3 mAh g<sup>-1</sup> at the current density of 100, 200, 400, 800, 1600, and 3200 mA g<sup>-1</sup>, which are far lower than the MnCO<sub>3</sub>/Mn<sub>3</sub>O<sub>4</sub>/RGO composites. These results fully indicate that the RGO in the composite mainly acts as conductive and protective matrix to promote the diffusion of ion and buffer the volume expansion of MnCO<sub>3</sub> and Mn<sub>3</sub>O<sub>4</sub>, and almost have no contribution to the specific capacity.

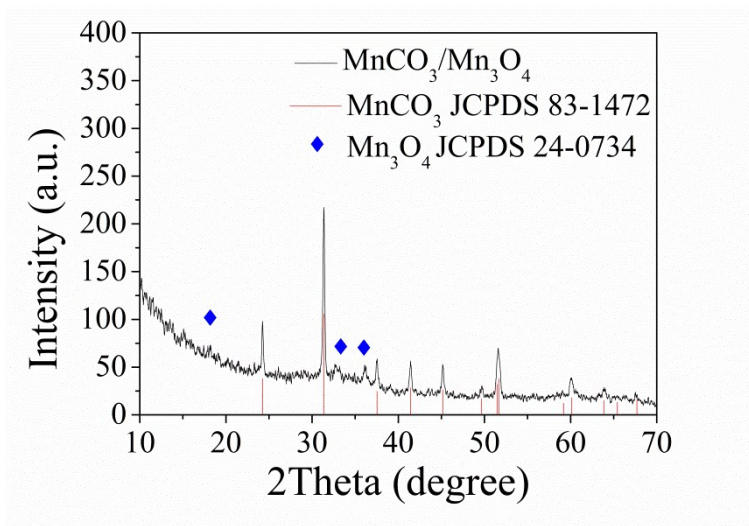

**Fig. S6** The XRD pattern of MnCO<sub>3</sub>/Mn<sub>3</sub>O<sub>4</sub> composite

From the XRD data, the Bragg reflection peaks are consistent with the MnCO<sub>3</sub> structure (indicated by red line) and the peaks indicated by blue square at 18°, 32° and 36° correspond to the (101), (103) and (211) reflections of Mn<sub>3</sub>O<sub>4</sub> crystals (PDF card No. 24-0734). The XRD data indicate that the composites are composites of MnCO<sub>3</sub> and Mn<sub>3</sub>O<sub>4</sub> without impurity phase.

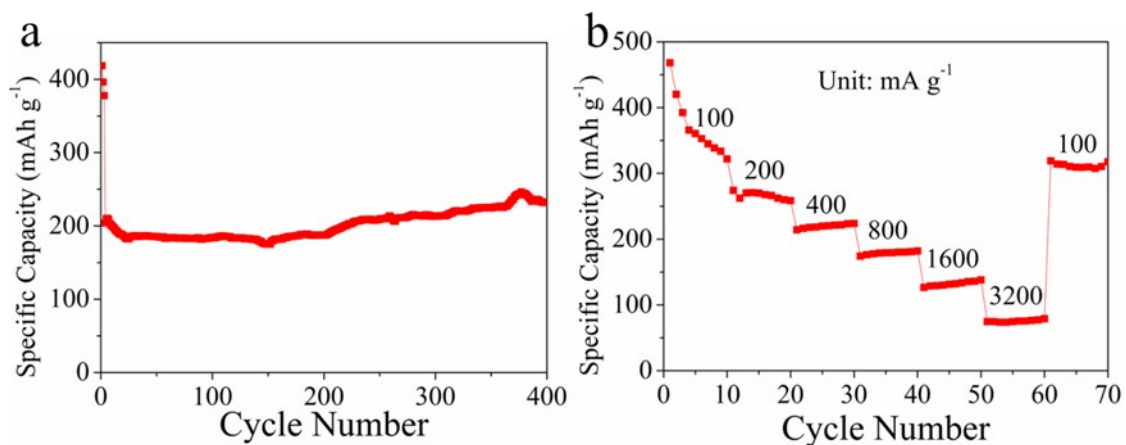

**Fig. S7** (a) Cycling performance at 1000 mA g<sup>-1</sup> (b) rate capability of MnCO<sub>3</sub>/Mn<sub>3</sub>O<sub>4</sub> composite

After 400 cycles at 1000 mA g<sup>-1</sup>, the retained capacity of the MnCO<sub>3</sub>/Mn<sub>3</sub>O<sub>4</sub> electrode was about 235 mAh g<sup>-1</sup>. Mn-based composite without RGO exhibited average discharge capacities of about 370, 266, 220, 179, 132, 76 and 312 mAh g<sup>-1</sup> at corresponding current densities of 100, 200, 400, 800, 1600, 3200 and 100 mA g<sup>-1</sup>, respectively. The results indicate that, without the RGO, the Mn-based composite has a relatively low capacity and poor rate performance.



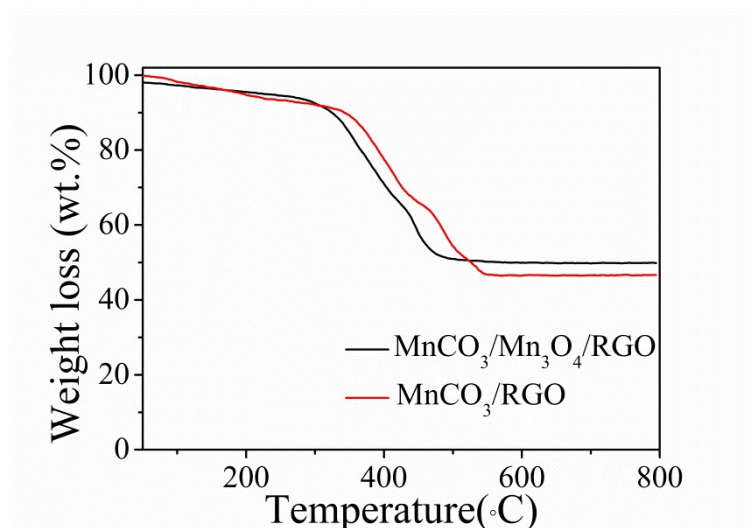

**Fig. S8** TGA curve of MnCO<sub>3</sub>/Mn<sub>3</sub>O<sub>4</sub>/RGO and MnCO<sub>3</sub>/RGO composite, which is obtained in air flow at a ramp rate of 10 °C min<sup>-1</sup>.

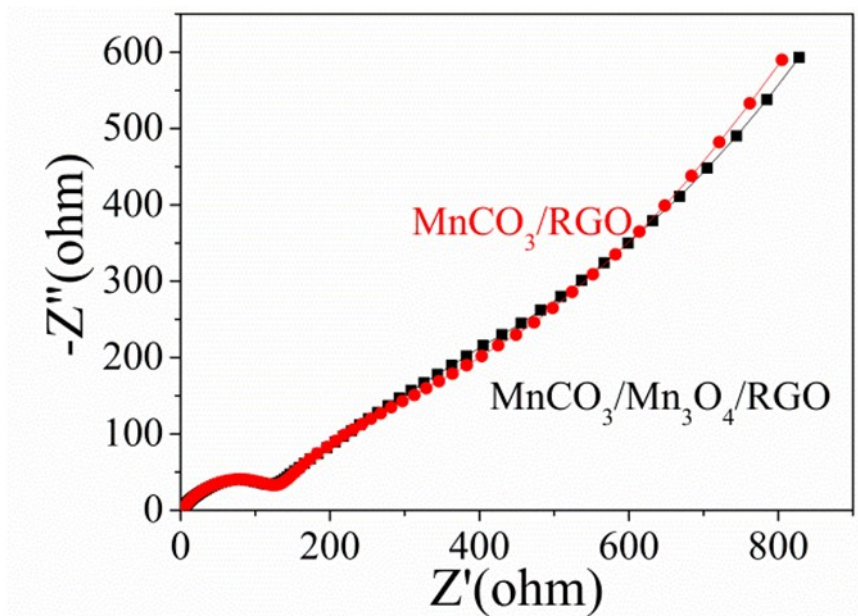

**Fig. S9** EIS curve of the  $MnCO_3/Mn_3O_4/RGO$  and  $Mn_3O_4/RGO$  composites at the 15<sup>th</sup> cycle.

**Table S1.** Comparison of the electrochemical performances of this work with the other MnCO<sub>3</sub>/RGO composites.

| Anode                                                  | Residual capacity<br>(mAh g <sup>-1</sup> )/cycles                                                   | Current (mA g <sup>-1</sup><br><sup>1</sup> ) or C | Ref.      |
|--------------------------------------------------------|------------------------------------------------------------------------------------------------------|----------------------------------------------------|-----------|
| MnCO <sub>3</sub> /Mn <sub>3</sub> O <sub>4</sub> /RGO | 988mA h g <sup>-1</sup> /200 <sup>th</sup> cycle<br>532mA h g <sup>-1</sup> /800 <sup>th</sup> cycle | 100<br>1000                                        | This work |
| MnCO <sub>3</sub> /RGO                                 | 755mA h g <sup>-1</sup> /100 <sup>th</sup> cycle                                                     | 0.5C                                               | 1         |
| MnCO <sub>3</sub> /RGO                                 | 845mA h g <sup>-1</sup> /100 <sup>th</sup> cycle                                                     | 0.2C                                               | 2         |
| MnCO <sub>3</sub> /RGO                                 | 1098mA h g <sup>-1</sup> /60 <sup>th</sup> cycle<br>775mA h g <sup>-1</sup> /100 <sup>th</sup> cycle | 46<br>233                                          | 3         |
| MnCO <sub>3</sub> /RGO                                 | 1474 mA h g <sup>-1</sup> /400 <sup>th</sup> cycle                                                   | 100                                                | 4         |
| MnCO <sub>3</sub>                                      | 656.8 mA h g <sup>-1</sup> /100 <sup>th</sup> cycle                                                  | 100                                                | 5         |
| MnCO <sub>3</sub>                                      | 40 mA h g <sup>-1</sup> /50 <sup>th</sup> cycle                                                      | 44                                                 | 6         |

1. Liu Zhang, Tao Mei, Xianbao Wang, Jianying Wang, Jinhua Li, Weilai Xiong, Y. Chen and M. Hao, *Cryst Eng Comm*, 2015, **17**, 6450-6455.
2. L. Zhou, X. Kong, M. Gao, F. Lian, B. Li, Z. Zhou and H. Cao, *Inorg. Chem.*, 2014, **53**, 9228-9234.
3. Z. Cao, Y. Ding, J. Zhang, Q. Wang, Z. Shi, N. Huo and S. Yang, *RSC Adv.*, 2015, **5**, 56299-56303.
4. S. Zhao, F. Feng, F. Yu and Q. Shen, *J. Mater. Chem. A*, 2015, **3**, 24095-24102.
5. L. Xiao, S. Wang, Y. Wang, W. Meng, B. Deng, D. Qu, Z. Xie and J. Liu, *ACS Appl. Mater. Interfaces*, 2016, **8**, 25369-25378.
6. T. Kesavan, S. Suresh, I. Arulraj, P. Ragupathy and S. Dheenadayalan, *Materials Letters* 2014, **136**, 411-415.
